1 Comprehensive analysis of mobile genetic elements in the gut microbiome

2 reveals phylum-level niche-adaptive gene pools

3 Xiaofang Jiang<sup>1,2,†</sup>, Andrew Brantley Hall<sup>2,3,†</sup>, Ramnik J. Xavier<sup>1,2,3,4</sup>, and Eric Alm<sup>1,2,5,\*</sup>

4 <sup>1</sup> Center for Microbiome Informatics and Therapeutics, Massachusetts Institute of Technology,

5 Cambridge, MA 02139, USA

6 <sup>2</sup> Broad Institute of MIT and Harvard, Cambridge, MA 02142, USA

7 <sup>3</sup> Center for Computational and Integrative Biology, Massachusetts General Hospital and Harvard

8 Medical School, Boston, MA 02114, USA

9 <sup>4</sup> Gastrointestinal Unit and Center for the Study of Inflammatory Bowel Disease, Massachusetts General

10 Hospital and Harvard Medical School, Boston, MA 02114, USA

11 <sup>5</sup> MIT Department of Biological Engineering, Massachusetts Institute of Technology, Cambridge, MA

12 02142, USA

13 <sup>†</sup> Co-first Authors

14 <sup>\*</sup> Corresponding Author

## 15 Abstract

16 Mobile genetic elements (MGEs) drive extensive horizontal transfer in the gut microbiome. This transfer  
17 could benefit human health by conferring new metabolic capabilities to commensal microbes, or it could  
18 threaten human health by spreading antibiotic resistance genes to pathogens. Despite their biological  
19 importance and medical relevance, MGEs from the gut microbiome have not been systematically  
20 characterized. Here, we present a comprehensive analysis of chromosomal MGEs in the gut microbiome  
21 using a method called Split Read Insertion Detection (SRID) that enables the identification of the exact  
22 mobilizable unit of MGEs. Leveraging the SRID method, we curated a database of 5600 putative MGEs  
23 encompassing seven MGE classes called ImmeDB (Intestinal microbiome mobile element database)  
24 (<https://immedb.mit.edu/>). We observed that many MGEs carry genes that confer an adaptive advantage  
25 to the gut environment including gene families involved in antibiotic resistance, bile salt detoxification,  
26 mucus degradation, capsular polysaccharide biosynthesis, polysaccharide utilization, and sporulation. We  
27 find that antibiotic resistance genes are more likely to be spread by conjugation via integrative  
28 conjugative elements or integrative mobilizable elements than transduction via prophages. Additionally,  
29 we observed that horizontal transfer of MGEs is extensive within phyla but rare across phyla. Taken  
30 together, our findings support a phylum level niche-adaptive gene pools in the gut microbiome. ImmeDB  
31 will be a valuable resource for future fundamental and translational studies on the gut microbiome and  
32 MGE communities.

33 **Keywords:** gut microbiome, mobile genetic elements, niche-adaptive, integrative conjugative elements,  
34 integrative mobilizable elements, horizontal gene transfer

## 35 Introduction

36 Horizontal gene transfer (HGT), the transfer of genes between organisms by means other than vertical  
37 transmission, allows for the rapid dissemination of genetic innovations between bacteria<sup>1</sup>. Ecology is an  
38 important factor shaping HGT, and the human gut in particular is a hotspot for HGT<sup>2,3</sup>. HGT impacts  
39 public health through its role in spreading antibiotic resistance genes<sup>4,5</sup>. The biological importance of  
40 HGT is exemplified by a porphyranase identified in *Bacteroides plebius* that digests seaweed, which was  
41 horizontally transferred from marine bacteria to human gut bacteria<sup>6</sup>. However, a major contributor to  
42 horizontal transfer - mobile genetic elements (MGEs) - have not been systematically characterized in the  
43 human gut microbiome.

44 Canonical classes of MGEs includes prophages<sup>7</sup>, group II introns<sup>8</sup>, and transposons<sup>9</sup>. It has become  
45 increasingly apparent that the acquisitions of a novel element class, genomic islands correspond to HGT  
46 events that differentiate commensal and pathogenic strains<sup>10</sup>. Genomic islands are non-canonical classes  
47 of MGEs that can transfer by conjugation or genomic regions derived from such MGEs. Integrative  
48 conjugative elements (ICEs) are a type of genomic island that can integrate into and excise from genomes  
49 using integrase, circularize using relaxase, replicate, and then transfer via conjugation<sup>11,12</sup>. Integrative  
50 mobilizable elements (IMEs) encode an integrase and relaxase for circularization like ICEs, but they have  
51 to hijack the conjugative machinery of co-resident ICEs or conjugative plasmids<sup>13</sup>.

52 Conventionally, HGTs are computationally identified by searching for the inconsistencies in the  
53 evolutionary history of gene and species<sup>14</sup>. However, this method overlooks the fact the horizontal  
54 transfer of multiple genes from the same locus might be the result of a single HGT event. Rather than  
55 individual genes, it is critical to identify the mobilizable units, in other words, the entire sequence of  
56 MGEs. Determining the mobilizable unit of MGEs is crucial to identify the mechanism of transfer, the  
57 preference of insertion sites, and cargo genes as well as to track the frequency of horizontal transfer  
58 events. In addition, information on MGEs are also valuable in the context of metagenomic analysis, as

59 MGEs confound many metagenomics workflows such taxonomic profiling, strain-level variation  
60 detection, and pangenome analysis.

61 The repetitive and mobile nature of MGEs confounds many types of studies in microbiome communities,  
62 such as taxonomic profiling, strain-level variation detection, and pan-genome analyses. However, unlike  
63 research in eukaryotes, where multiple repeats databases exist for masking and annotation of repetitive  
64 DNA<sup>15</sup>, only a limited number of databases dedicated to the collection of MGE in prokaryotes<sup>16-19</sup>. Yet,  
65 these database are either limited one specific class of MGE or obsolete and not applicable for microbiome  
66 research. With the growing deluge of microbiome metagenomic sequencing data, a comprehensive MGE  
67 database of the gut microbiome is becoming increasingly critical.

68 In this study, we sought to characterize MGEs from the gut microbiome to understand how horizontal  
69 gene transfer by MGEs shapes the evolution of bacteria in the gut microbiome. First, we developed a  
70 method to identify the exact mobilizable unit of active MGEs using whole metagenome sequencing data  
71 together with references genomes. The algorithm implemented in SRID is similar to that of Daisy<sup>20</sup>, the  
72 first mapping-based HGT detection tool to our knowledge. Unlike Daisy, SRID was designed for use in a  
73 metagenomic context and doesn't require pre-existing knowledge of both acceptor and donor genomes.

74 We systematically identified MGEs with SRID and curated a database named ImmeDB (Intestinal  
75 microbiome mobile element database) dedicated to the collection, classification and annotation of these  
76 elements. The database is organized into seven MGE classes. Each MGE entry provides a visualization of  
77 annotations and downloadable genomic sequence and annotation. We detected many MGEs carrying  
78 cargo genes that confer an adaptive advantage to the gut environment. We also found that conjugation via  
79 integrative conjugative elements/ integrative mobilizable elements is more important than transduction  
80 via prophage for the spread of antibiotic resistance genes. This study provides insights into how the  
81 interplay of MGEs, bacteria, and the human host in the gut ecosystem lead to community-wide  
82 adaptations to the gut environment. The curated database of MGEs we have assembled here can be used  
83 by metagenomic workflows to improve future microbiome studies.

## 84 Results

### 85 Prevalence of MGEs in species of the gut microbiome

86 We systematically identified active MGEs from species of the human gut microbiome using mapping  
87 information from metagenomic reads from the Human Microbiome Project (HMP)<sup>21</sup>. MGEs are actively  
88 inserted and deleted from genomes, causing differences between strains of bacteria. We found cases  
89 where the reference genome of a bacterial strain differed from strains in the individual samples from the  
90 HMP. To find the sequences responsible for these differences, we mapped HMP metagenomic reads to  
91 available gut-associated bacterial reference genomes and identified genomic regions flanked by split reads  
92 and discordantly-aligned paired-end reads (Figure 1A). These regions potentially are recent insertions of  
93 active MGEs. The MGEs identified with the SRID method are limited to chromosomal MGEs. Thus,  
94 plasmids and extrachromosomal prophages were not characterized in this study. By searching for MGE-  
95 specific gene signatures, we verified and classified these MGEs (See Figure 1B and Methods).

96 We identified 5600 putative MGEs from gut microbiome representatives of 84 strains of Actinobacteria  
97 (10 species), 280 strains of Bacteroidetes (97 species), 158 strains of Firmicutes (118 species), 14 strains  
98 of Proteobacteria (12 species), and five strains of Verrucomicrobia (4 species) (Supplementary Table 2;  
99 Supplementary Data 1). Then, we classified the identified MGEs based on their transfer and transposition  
100 mechanisms into seven classes: ICEs, prophages, IMEs, group II introns, transposons, unclassified islets,  
101 and unclassified genomic islands (Figure 1C). Most of the MGEs identified (5145/5600) were from the  
102 phyla Bacteroidetes and Firmicutes because these two phyla tend to dominate the gut microbiome of  
103 healthy adults<sup>21</sup>. In general, smaller elements, such as transposons, had higher copy numbers per genome  
104 while larger elements, such as ICEs, prophages, and unclassified genomic islands, had a maximum of two  
105 copies per genome (Supplementary Figure 1).

106 Different strains of the same species often share identical or nearly-identical MGEs. To eliminate this  
107 redundancy, we collapsed MGEs into clusters based on overall nucleotide identity (Figure 1C). Phylum-  
108 level differences in the diversity of MGEs were revealed. For example, Bacteroidetes had more diversity

109 of ICEs than Firmicutes (45 vs. 26 respectively), while Firmicutes had more diversity of prophages than  
110 Bacteroidetes (49 vs. 20 respectively).

## 111 Diversity of MGE modules in gut microbiota

112 Although it has been known that ecology is important in shaping MGEs in the gut microbiome, this study  
113 is the first to systematically characterize the mechanisms of transposition and transfer for MGEs of the  
114 gut microbiome<sup>2</sup>. We annotated the genes in MGEs involved in their transposition and transfer, and then  
115 classified the elements into groups based on these annotations (Supplementary Table 2; Supplementary  
116 Data 2).

117 There are four major protein families responsible for transposition of gut MGEs: serine integrases,  
118 tyrosine integrases, DDE transposases, and group II intron proteins conferring reverse transcriptase and  
119 endonuclease activity. Serine and tyrosine integrases are the most prevalent protein families responsible  
120 for transposition in ICEs, IMEs, and prophages. In the gut microbiome MGE clusters we identified, we  
121 found 315 MGEs with tyrosine integrases (54 from ICEs, 206 from IMEs and 55 from prophages) and  
122 110 MGEs with serine integrases (18 from ICEs, 67 from IMEs and 25 from prophages). Interestingly,  
123 while tyrosine integrases are found in several phyla, serine integrases of ICEs and prophages were  
124 exclusively found in the phylum Firmicutes. In IMEs, most serine integrases were identified in  
125 Firmicutes, but 10 clusters of serine integrases were found in Bacteroidetes and Actinobacteria (9 and 1  
126 respectively). No ICEs and IMEs with DDE transposase were identified in our study. Nine prophage  
127 clusters were found with DDE transposase from IS families: IS30, IS256, and IS110. Interestingly, all  
128 three IS families use copy-paste mechanisms generating a transient double-stranded circular DNA  
129 intermediate to facilitate transposition<sup>22</sup>. This suggests that transient double-stranded circular  
130 intermediates may be essential for the life cycle of many prophages. All transposons we identified utilized  
131 DDE-transposase. We identified 19 families of transposase. Most of the transposase clusters we identified  
132 are present in insertion sequences. Seven clusters (28 copies) of transposons are composite transposons  
133 flanked by two different insertion sequences families.

134 ICES and IMEs encode relaxases (MOB) to initiate DNA mobilization and transfer. We used the  
135 CONJscan-T4SSscan server to classify relaxases identified in MGEs<sup>23</sup>. Seven types of relaxase were  
136 identified in ICES and IMEs. In ICES, MOB<sub>T</sub> was identified only in Firmicutes, MOB<sub>V</sub> was identified  
137 only in Bacteroidetes, and MOB<sub>P1</sub> was identified in Firmicutes, Bacteroidetes, and Actinobacteria. IMEs  
138 have a more diverse reservoir of relaxases. Besides the three types of relaxase found in ICES, we also  
139 identified IMEs with MOB<sub>P3</sub>, MOB<sub>B</sub>, MOB<sub>F</sub>, and MOB<sub>Q</sub> type relaxases.  
140 ICES are capable of conjugation via mating pair formation systems. Six types of mating pair formation  
141 systems for conjugation have been described<sup>23</sup>. We found three types of mating pair formation system:  
142 typeB, typeFA, and typeFATA, in ICES from the gut microbiome. Consistent with previous findings, type  
143 FA systems were identified in 7 ICE clusters from Firmicutes, type B systems were identified in 45 ICE  
144 clusters from Bacteroidetes, and type FATA systems were identified in 19 Firmicutes ICE clusters and  
145 one Actinobacteria ICE cluster<sup>24</sup>.

## 146 MGEs carry niche-adaptive genes

147 Although fundamentally selfish, MGEs often carry genes other than those necessary for their  
148 transposition and transfer, sometimes referred to as cargo genes<sup>25</sup>. We found that smaller elements like  
149 transposons generally carry zero or only a few cargo genes. Genetic islands like ICES and IMEs often  
150 carry numerous cargo genes (median cargo genes 44 and 12 respectively). One example is an ICE found  
151 in *Bacteroides sp. 2\_I\_56FAA* (NZ\_GL945043.1:1512740-1656974) which carries 139 cargo genes. We  
152 performed functional annotation on the cargo genes, and enrichment analysis using gene ontology (GO),  
153 Pfam, and Resfam<sup>26-28</sup> (Supplementary Table 4). Several classes of enriched genes are well-known to be  
154 associated with the maintenance of MGEs such as restriction-modification systems and toxin-antitoxin  
155 pairs (Supplementary Table 4). Many other gene families carried by MGEs may confer an adaptive  
156 advantage to colonize the gut.

## 157 Antibiotic resistance genes

158 Many classes of antibiotics consumed orally are incompletely absorbed in the small intestine, and  
159 therefore proceed to the large intestine where they can kill the resident microbes<sup>29</sup>. Therefore, genes that  
160 confer antibiotic resistance can be adaptive to the gut environment. In total, we identified 781 antibiotic  
161 resistance genes encompassing 46 distinct classes carried by MGEs. Classes of MGEs varied in their  
162 carriage of antibiotic resistance genes. Of 8151 prophage cargo genes, only 13 were found to be antibiotic  
163 resistance genes. The carriage rate of antibiotic resistance genes normalized by total cargo genes in  
164 prophages is more than ten times lower than that identified in ICEs (330/16820) and IMEs (229/11053)  
165 (Supplementary Figure 1). This suggests that conjugation via ICE/IME may be more important than  
166 transduction in the spread of antibiotic resistance genes, consistent with previous findings<sup>30,31</sup>.

167 GO analysis revealed that cargo genes from the class “rRNA modification” (GO:0000154), which confers  
168 resistance to a wide range of antibiotics including tetracycline and erythromycin, are enriched in both  
169 Bacteroidetes and Firmicutes. Resfam enrichment analysis also supported this, as RF0135 (tetracycline  
170 resistance ribosomal protection protein), and RF0067 (Emr 23S ribosomal RNA methyltransferase) were  
171 enriched. Other enriched antibiotic resistance gene classes carried by MGEs confer resistance to  
172 chloramphenicol (RF0058), cephalosporins (RF0049) and aminoglycosides (RF0167).

173 One example of an MGE responsible for the transmission of antibiotic resistance is the ICE CTnDOT, the  
174 spread of which dramatically increased the prevalence of tetracycline-resistant Bacteroidetes species<sup>32</sup>.  
175 CTnDOT-like ICEs were clustered in ICE1. Elements in this cluster typically confer resistance to  
176 tetracycline via the tetQ antibiotic resistance gene (Figure 2A). In addition, ICE1 elements have multiple  
177 sites where antibiotic resistance genes can be inserted or substituted. We characterized 5 insertions of  
178 antibiotic resistance genes into ICE1 (Figure 2A). Insertion sites 1, 2, and 5 are between operons;  
179 therefore they do not interrupt the function of crucial genes. We observed one insertion and two  
180 substitutions of antibiotic resistance genes around the tetQ operon, suggesting that this site is likely a  
181 “hotspot” for insertions and substitutions of antibiotic resistance genes. Our analysis reveals the



182 surprising extent to which MGEs in species of the gut microbiome contribute to the phenomenon of  
183 antibiotic resistance and that the insertion of antibiotic resistance genes into MGEs is an active and  
184 ongoing process.

#### 185 Bile salt hydrolase and bile transporters

186 Bile acids are found in high concentrations in the human intestines<sup>33</sup> and can be toxic to bacteria<sup>34</sup>.  
187 Therefore, gut microbes have developed strategies to deal with bile acids by actively pumping bile acids  
188 out of the cell, or via deconjugation, which is hypothesized to diminish the toxicity of bile acids<sup>33,34</sup>. The  
189 high identity of archaeal and bacterial bile salt hydrolases strongly suggests the horizontal transfer of this  
190 gene<sup>35</sup>. A sodium bile acid symporter family (PF01758), which could help to pump bile acids out of the  
191 cell, was found to be enriched in the cargo genes of MGEs. Furthermore, 61 examples of bile salt  
192 hydrolases were identified as cargo genes of MGEs (Supplementary Table 3). Thus, MGEs carry genes  
193 that help microbes to overcome a specific challenge of colonizing the human gut.

#### 194 Glycoside hydrolases for mucus utilization

195 The colon is lined with a layer of mucus composed of the glycoprotein MUC2<sup>36</sup>. The glycans that  
196 decorate MUC2 have a core structure composed of galactose, N-acetylglucosamine, N-  
197 acetylgalactosamine, with terminal residues of fucose and sialic acid<sup>37</sup>. These specific glycans are a major  
198 energy source for members of the gut microbiota<sup>38</sup>. Therefore, it may benefit members of the gut  
199 microbiota to degrade these specific glycans<sup>39</sup>. We found cargo genes carried by MGEs from  
200 Bacteroidetes species were enriched for GO:0004308, an exo-sialidase involved in the degradation of  
201 mucosal glycans. In addition, we identified 60 glycoside hydrolases capable of degrading mucosal  
202 glycans carried by MGEs from the categories: sialidases (GH33), fucosidases (GH95),  $\alpha$ -N-  
203 acetylgalactosaminidases (GH109), and  $\beta$ -galactosidases (GH20)<sup>38,40</sup> (Supplementary Table 3). Thus,  
204 MGEs carry genes to unlock a key energy source available to gut microbes.

## 205 Polysaccharide Utilization Loci

206 Gut Bacteroidetes can utilize a wide variety of polysaccharides via the products of polysaccharide  
207 utilization loci, which collectively make up large proportions of Bacteroidetes genomes<sup>41</sup>. Each  
208 polysaccharide utilization locus contains a copy of the gene *SusC*, a sugar transporter, and *SusD*, a glycan  
209 binding protein<sup>42</sup>. Due to the wide range of polysaccharides available to gut microbes, it is hypothesized  
210 that the possession of a large repertoire of polysaccharide utilization loci confers an adaptive advantage in  
211 Bacteroidetes<sup>41</sup>. We found 43 polysaccharide utilization loci containing both *SusC* and *SusD* carried by  
212 MGEs suggesting that the ability to degrade complex polysaccharides may be readily transferred between  
213 members of the gut microbiota (Supplementary Table 3).

## 214 Capsular Polysaccharide Biosynthesis Loci

215 Many bacterial species produce capsules, an extracellular structure made up of polysaccharides<sup>43</sup>.  
216 However, gut Bacteroidetes species have a large repertoire of capsular polysaccharide biosynthesis loci  
217 (up to 8) compared to other bacterial species and even Bacteroidetes from other sites such as the mouth<sup>44</sup>.  
218 Furthermore, capsular polysaccharide biosynthesis loci have been reported to be the most polymorphic  
219 region of *Bacteroides* genomes<sup>45,46</sup>. Multiple capsular polysaccharide biosynthesis loci are necessary to  
220 competitively colonize the gut, and are therefore considered to be gut adaptive genes in gut  
221 Bacteroidetes<sup>47</sup>.

222 Capsular polysaccharide biosynthesis loci are large and complex; many contain upwards of 20 genes<sup>43</sup>.  
223 We found 21 complete or fragmented capsular polysaccharide biosynthesis loci containing at least 10  
224 genes carried by MGEs (Supplementary Table 3). For example, almost identical copies of ICE9  
225 containing a capsular polysaccharide biosynthesis locus were found in two species, *B. stercoris* and *B. sp.*  
226 *UW*. The same capsular polysaccharide biosynthesis locus was also found in *B. vulgatus*, but the ICE9  
227 copy was slightly divergent. Two other copies of ICE9 likely containing an orthologous capsular  
228 polysaccharide biosynthesis locus were also found in *B. fragilis* and *B. sp. 9\_1\_42FAA* (Figure 2B).  
229 Additionally, many GO-terms related to capsular polysaccharide biosynthesis are enriched in

230 Bacteroidetes MGEs including GO:0045226, GO:0034637, GO:0044264, and GO:0000271. A Pfam for  
231 glycosyltransferases involved in the biosynthesis of capsular polysaccharides (PF13579) was enriched in  
232 Bacteroidetes MGEs. The transfer of large segments of capsular polysaccharide biosynthesis loci by  
233 MGEs may help to explain the incredible diversity of capsular polysaccharide biosynthesis loci observed  
234 in the genomes of gut Bacteroidetes<sup>48</sup>.

## 235 Sporulation

236 The gut is an anaerobic environment colonized by many classes of strictly anaerobic organisms<sup>49,50</sup>.  
237 However, to transmit between hosts, gut microbes must be exposed to oxygen. Recent work has shown  
238 that many more gut microbes form spores than previously thought, likely enabling transmission between  
239 hosts<sup>51</sup>. In Firmicutes, 14 genes involved in sporulation (GO:0030435) were found to be enriched in  
240 MGEs. In addition, PF08769 (Sporulation initiation factor Spo0A C terminal) and PF04026 (SpoVG)  
241 were also enriched in our Pfam analysis.

242 One example is GI153, a genetic island from *Faecalibacterium prausnitzii* A2-165, which contains a  
243 series of spore formation-related genes in an operon: SpoVAC, SpoVAD, spoVAEb, gpr (spore protease),  
244 and spoIIP. Another example is GI175, a genetic island derived from a degenerate prophage in *Roseburia*  
245 *intestinalis* L1-82. In one operon of GI175, there are three genes: SpoVAEb, SpoVAD, and one unknown  
246 gene with Cro/C1-type HTH DNA-binding domain. SpoVAC, SpoVAD, spoVAEb homologs were  
247 previously found to be carried by a Tn1546-like ICE and conferred heat resistance to spores in the model  
248 spore forming organism *Bacillus subtilis*<sup>52</sup>. Thus, MGEs may help to transfer genes involved in  
249 sporulation between gut microbiota which may prove adaptive for colonizing new hosts.

## 250 Summary of cargo genes

251 Many additional gene families were found to be enriched in MGEs that could plausibly be niche adaptive  
252 including: histidine sensor kinases, and genes involved in vitamin B biosynthesis (Supplementary Table  
253 4). Notably, MGEs from Firmicutes and Bacteroidetes have different types of genes enriched reflecting

254 the differences in physiology between the phyla. Antibiotic resistance genes and genes involved in the  
255 detoxification of bile acids are enriched in MGEs from both phyla. Glycoside hydrolases for mucus  
256 utilization, and capsular polysaccharide biosynthesis loci are enriched only in MGEs from Bacteroidetes,  
257 while genes for sporulation are enriched in MGEs only from Firmicutes. Overall, the transfer of niche  
258 adaptive genes by MGEs likely has a large impact on the fitness of species of the gut microbiome.

## 259 Host ranges and evolution of MGEs

260 Although MGEs readily transfer between species, there has not been a systematic analysis of the host  
261 range of MGEs in the gut microbiome. The host ranges of different classes of MGEs is variable, and even  
262 within a class, different elements have variable host ranges. Understanding the host range of gut MGEs is  
263 of particular importance because gut MGEs carry many cargo genes, and the host range of the MGE  
264 defines how widely these cargo genes can be distributed. For example, the gut microbiome is a reservoir  
265 of antibiotic resistance genes, and many antibiotic resistance genes are located within MGEs<sup>53</sup>. Therefore,  
266 it is important to understand the probability of the transfer of MGEs with antibiotic resistance genes from  
267 commensals to pathogens<sup>53</sup>.

268 First, we studied the host range of MGEs from the same cluster. MGEs in the same cluster that exist in at  
269 least two species generally represent recent horizontal transfer. Some MGE clusters are present in a wide  
270 range of species indicative of active horizontal transfer. One example is the ICE1 cluster, a representative  
271 of the CTnDOT-like ICEs, which is found in 32 species of Bacteroidetes from the genera: *Bacteroides*,  
272 *Parabacteroides*, *Allistipes*, and *Paraprevotella* (Supplementary Figure 1). The entirety of the 49kb  
273 element is found at more than 99 percent nucleotide identical to 10 *Bacteroides*, *Parabacteroides*, and  
274 *Allistipes* species, indicative of very recent horizontal transfer. This cluster also includes other CTnDOT-  
275 like elements with more variability such as CTnERL, which has an additional insertion of an IME  
276 conferring erythromycin resistance<sup>54</sup>. Another example is the Firmicutes ICE cluster ICE10, which is  
277 found in 10 species of the families *Lachnospiraceae* and *Ruminococcaceae*. This ICE10 cluster belongs  
278 to Tn916/Tn1549 family of ICEs, some members of which carry the medically-important VanB gene

279 conferring resistance to vancomycin<sup>55</sup>. We found no examples of ICEs from the same cluster present in  
280 multiple phyla. Clusters of prophage, IMEs, group II introns, and transposons were also found in many  
281 species but were again limited to a single phylum. Our results support that although the recent horizontal  
282 transfer of MGEs is common within phyla, cross-phyla horizontal transfer is rare, as we did not observe  
283 any cross-phyla horizontal transfer events for elements of the same cluster.

284 Here we generated phylogenetic trees of tyrosine and serine integrases from ICEs and prophages  
285 identified to study the evolutionary history of the recombination module of MGEs. To contrast the  
286 phylogeny of the tyrosine and serine integrases with host species lineages we plotted tanglegrams (Figure  
287 3 and Figure 4). The phylogeny of both the serine and tyrosine integrases is incongruent with the host  
288 species lineages which is indicative of extensive past horizontal transfer of ICEs and prophages between  
289 species of the gut microbiome.

290 The tyrosine integrases can be divided into two clades: the first is associated with the phylum  
291 Bacteroidetes, the second clade is associated with the phyla Proteobacteria, Actinobacteria, Firmicutes  
292 and Verrucomicrobia (Figure 3). Tyrosine integrases from Bacteroidetes show no evidence of close inter-  
293 phyla transfer but ancient transfers of tyrosine integrases between the phyla Proteobacteria,  
294 Actinobacteria, and Firmicutes likely occurred several times during evolution. Serine integrases from  
295 ICEs and prophages were only found in the phylum Firmicutes. Therefore, we found no evidence of inter-  
296 phyla transfer for ICEs and prophages with serine integrases suggesting a phylum-level restriction in host  
297 range.

298 We also examined whether integrases derived from ICEs and prophages segregated into clades based on  
299 element type. Previous studies on the phylogenetic relationships of integrases from ICEs and prophages  
300 did not find strong evidence of intermingling between ICE and prophage integrases<sup>56,57</sup>. In our phylogeny  
301 of the tyrosine integrases, ICE and prophage integrases are extensively intermingled, suggesting that ICEs  
302 and prophages have exchanged integrases multiple times over the course of evolution. Moreover, in our  
303 phylogeny of serine integrases, ICE22 and ICE64 appear in a branch containing mostly prophages,  
304 suggesting that the integrase may have originated from a prophage integrase.

305 Unlike prophages and ICEs, 8 of 67 clusters of IMEs use serine integrases to transpose in Bacteroidetes.  
306 This implies that although integration via serine integrases occurs in Bacteroidetes, it occurs much less  
307 frequently than integration via tyrosine integrases. For transposons, 17 out of 19 transposase families  
308 were found in species from different phyla, indicating an extensive history of ancient horizontal transfer.  
309 Based on the tanglegram of group II intron proteins, no phylum corresponds to a single clade of group II  
310 introns, indicating cross-phyla horizontal transfers during the evolution of group II introns in the gut  
311 microbiome (Supplementary Figure 2).  
312 In summary, although ancient cross-phyla horizontal transfers did occur during the evolution of MGEs,  
313 we did not observe recent cross-phyla horizontal transfer of MGEs. Therefore, the gene pools that are  
314 shared within the gut microbiome are likely limited to the phyla-level.

## 315 Modular evolution of gut MGEs

316 Genes in MGEs are typically organized in functionally related modules which can be readily exchanged  
317 between MGEs. Type of modules found in MGEs include: conjugation, integration, regulation, and  
318 adaptation. Deletion, acquisition, and exchanges of these modules can lead to immobilization, adaptation,  
319 and shifts in insertion specificity and host ranges of MGEs<sup>13</sup>. Here, we detail examples of each of these  
320 types of events.

321 Many unclassified genetic islands are likely remnants of ICEs or prophages due to the presence of only a  
322 subset of genes necessary for autonomous transfer. In many cases, the integrase have been lost while  
323 other genes for conjugation or capsid formation are maintained. One example is GI73, which appears to  
324 have formed when a CTnDOT-like element lost its conjugation and mobilization modules to a large  
325 deletion (Figure 5A). We also observed many examples of the acquisition of new modules by insertions.  
326 CTnDOT-like elements have obtained adaptive modules via insertions of a group II intron together with  
327 the antibiotic resistance gene ErmF, an IME containing multiple antibiotic resistance genes including:  
328 ANT6, tetX, and ErmF<sup>54,58</sup>, and other unidentified insertions containing many antibiotic resistance genes  
329 (Figure 2A; Supplementary Data 3; Supplementary Table 5). Other examples are GI90, where ICE7

330 (CTnBST) inserted into a CTnDOT-like element (Figure 5A), and GI46, a genomic island formed when  
331 two types of ICEs (ICE43 and ICE56) inserted in tandem (Figure 5B). We observed that the exchange of  
332 recombination modules is common. Integrases have frequently been exchanged between ICEs and  
333 prophages during the evolution of MGEs (Figure 3 and Figure 4). Exchanges also occur in the same class  
334 of MGE. For example, we observed that two clusters of ICEs, ICE15 and ICE16, share nearly identical  
335 sequences and the same typeFA conjugation module, but have different integrases: ICE15 has a tyrosine  
336 integrase while ICE16 has a serine integrase (Figure 5C). Overall, the modular nature of MGEs enables  
337 the formation of new mosaic elements, leading to the diversification of MGEs, and increasing the  
338 dynamics of the gene pools in the gut microbiome.

## 339 Discussion

340 In this study, we systematically characterized MGEs from the gut microbiome using a novel method to  
341 identify the mobilizable unit of active MGEs. We dramatically expanded the number of annotated MGEs  
342 from gut microbial species by identifying 5600 putative MGEs. The MGEs we identified allows for the  
343 understanding of several fundamental questions about the role of MGEs and their importance to the  
344 evolution of species of the gut microbiome.

### 345 Implications for future gut metagenomic analysis

346 The database of MGEs we have curated will be a valuable resource for future studies on the gut  
347 microbiome, especially with the increasing importance of taxonomic profiling, strain-level variation  
348 detection, and pangenome analyses. Many metagenomic workflows for taxonomic profiling use marker  
349 genes or k-mers “unique” to a specific species, where uniqueness is constrained by the available  
350 reference genomes<sup>59-61</sup>. These marker gene should exclude MGEs, as the potential horizontal transfer of  
351 these elements invalidates their “unique” species-specific associations. Strain-level variation analyses that  
352 based on single nucleotide polymorphisms (SNPs) or copy number variation should also exclude SNPs

353 from MGEs<sup>62-65</sup>. In pangenome analysis, it is beneficial to distinguish the accessory genes unique to an  
354 individual species and the mobilome shared among multiple species. To address the problems posed by  
355 MGEs to metagenomic workflows, an approach common in eukaryotic genomics, repeat masking, can be  
356 applied<sup>66,67</sup>. The database of curated MGEs identified in this study can be used to mask gut microbiome  
357 reference genomes before metagenomic workflows such as species-level classification, strain-level  
358 detection, and pangenome analyses are performed.

### 359 Host ranges of MGEs and the spread of antibiotic resistance genes

360 In the United States alone, more than 23,000 people die each year from antibiotic-resistant infections<sup>68</sup>.  
361 Tracking antibiotic resistance is one of the key actions to fight the spread of antibiotic resistance. The  
362 human digestive tract is a major reservoir of antibiotic resistance genes and likely serves as a hub for the  
363 horizontal transfer of antibiotic resistance genes from commensals to pathogens<sup>4,5,53</sup>. MGEs play a  
364 significant role in the spread of antibiotic resistance genes, and we found that many MGEs in the gut  
365 microbiome contain antibiotic resistance genes. This study helps to define the host range of MGEs in the  
366 gut microbiome. Our results suggest that HGT occurs mostly within a phylum, and inter-phyla HGT is  
367 rare. These results underscore the risk posed by transfer of antibiotic resistance genes like the  
368 vancomycin-resistance conferring gene VanB between commensal Firmicutes and pathogenic Firmicutes,  
369 such as *Enterococcus faecalis*<sup>69</sup>. Overall, our study advances the understanding of the host range of MGEs  
370 which is of critical importance to understand gene flow networks in the gut.

371

372 This study underestimates the extent of host range because only MGEs in sequenced genomes were  
373 detected. As more bacterial genomes are sequenced, the extent of host range of MGEs will be refined.

374 The scope of our research is chromosomal MGEs. Thus, plasmids or prophages existing as an  
375 extrachromosomal plasmid were not characterized in this study. Future studies using a combination of  
376 molecular and computational approaches are beneficial to further understand the rate and extent of  
377 horizontal gene transfer by MGEs.



### 378 Niche-adaptive genes in the communal gene pool

379 The mammalian gut is a unique ecological niche vastly different from other environments due to the  
380 presence of IgA, antimicrobial peptides, bile acids, as well as specific polysaccharides available for  
381 utilization in the intestinal mucus. The microbes that inhabit the gut must develop mechanisms to cope  
382 with these challenges. We observed that MGEs transfer genes to help address the unique challenges of  
383 colonizing the human gut. MGEs influence the spread of gut adaptive genes in three ways. First, the  
384 spread of MGEs drives the expansion and diversification of protein families such as those involved in  
385 polysaccharide utilization, capsular polysaccharide biosynthesis, and sensing and responding to the  
386 environment<sup>9</sup>. Second, MGEs transfer successful innovations for colonizing the gut among distantly-  
387 related species from the same niche, such as bile salt hydrolases. Third, MGEs allow for the amplification  
388 and transfer of genes that are adaptive only under specific conditions, such as antibiotic resistance genes,  
389 and sporulation-related genes.

390 Cargo genes transferred by MGEs can have wide-ranging effects on the biology of the gut microbiome.  
391 They potentially involved in bacterial symbioses, sensing and responding to environmental stimuli, and  
392 metabolic versatility. The enriched classes of cargo genes we identified in this study are attractive targets  
393 for future studies to understand the underlying biology of the gut microbiome.

### 394 Opportunities to use MGEs to engineer gut microbes

395 Tools for genome editing only exist for a very limited number of species of the gut microbiome despite  
396 the exceptional basic and translational opportunities afforded by engineering gut species. Many of the  
397 tools for editing the genomes of species were originally derived from MGEs. For instance, the NBU  
398 system used to modify some *Bacteroides* species was originally derived from an IME<sup>70</sup>, and the  
399 TargeTron system was originally derived from a group II intron<sup>71</sup>. The novel examples of MGEs  
400 identified in this study could be used to edit genomes from the gut microbiome, especially in currently  
401 intractable species such as *Faecalibacterium prausnitzii*. Unlike phages, whose cargo genes are limited by  
402 the capsid size, many novel ICEs and IMEs carry hundreds of genes that can confer selective advantages

403 for the host, and are excellent candidate vectors for large genetic loci. Overall, the MGEs identified in this  
404 study could have translational applications for genome editing of species from the gut microbiome.

## 405 Methods

### 406 Detection of putative MGEs

407 80 Samples from the Human Microbiome Project (HMP)<sup>21</sup> and 66,232 bacterial genomes were  
408 downloaded from the NCBI (2016/09/14). We used Mash<sup>72</sup> to calculate the minhash distance between  
409 each genome and all metagenomic samples with the default sketch size of  $s = 1000$  and  $k = 21$ . If the  
410 matching-hashes shared between a genome and the 80 metagenomic samples are less than 2, the genome  
411 is unlikely have enough alignments from these samples and was removed. This steps help us quickly  
412 remove genomes that likely do not exist or exist in low abundance in gut microbiome. 9,846 genomes  
413 remained after this filtering step. Metagenomic reads from HMP samples were aligned to each of the  
414 9,846 genome separately with bwa (version 0.7.5a-r405)<sup>73</sup>. To find genomic regions that differ in terms of  
415 insertions/deletions between strains in the individual samples and the reference genomes, we used split  
416 reads and information from pair-end reads from the alignment (Figure 1A). First, we identified putative  
417 deletion junctions using split reads, which we defined as reads that align to two distinct portions of a  
418 genome. Split reads were initially identified as those reads having multiple hits in the SAM output from  
419 bwa. If a split read alignment starts at one genomic location in the reference and then “jumps” to aligning  
420 to a distant site downstream in the same strand, it may indicate a potential deletion in the strain of bacteria  
421 from the metagenomic sample compared to the reference genome. For each putative deletion junctions,  
422 we confirmed the presence of the junction by determining if paired-end reads flanked the junction. We  
423 considered a deletion junction to be valid if the reads pairs flanking the junction were aligned in the  
424 correct orientation, and the distance between the pairs minus the junction size is within the range of  $\pm 2$   
425 times the standard deviation of the mean insertion size (202.4  $\pm$  2X71.5 for our data set) . Regions with

426 more than four split reads and more than four read pairs supporting the deletion were considered as  
427 putative MGEs. We chose the MGEs ranging in size between 1kbp and 150kpbs to reduce the number of  
428 spurious results. In total, we identified MGEs in 703 genomes. The code used to implement the SRID  
429 method, genome assembly accession numbers and HMP SRA accession numbers used in this study are  
430 available from github (<https://github.com/XiaofangJ/SRID>) and the Supplementary Data 4.

### 431 MGE signature detection

432 Genes from the 703 genomes identified before were predicted with Prodigal (version 2.6.3)<sup>74</sup>. Protein  
433 sequences were functionally annotated with interproscan (version 5.19-58.0) using the default settings<sup>75</sup>.  
434 Then, we used the interproscan annotations to identify serine and tyrosine integrases as well as group II  
435 intron proteins from all genomes. prophage-related genes were identified by searching for genes with  
436 Pfams signatures identified in phage\_finder<sup>76</sup>. Serine integrases were identified as genes annotated with  
437 the Pfam identifiers: PF00239 (Resolvase: resolvase, N terminal domain), PF07508 (Recombinase:  
438 recombinase), and PF13408 (Zn\_ribbon\_recom: Recombinase zinc beta ribbon domain). Tyrosine  
439 integrases were identified as genes annotated with the identifiers: PF00589 (Phage\_integrase: site-  
440 specific recombinase, prophage integrase family), PF02899 (Phage\_integr\_N: prophage integrase, N-  
441 terminal SAM-like domain), PF09003 (Phage\_integ\_N: bacteriophage lambda integrase, N-terminal  
442 domain), TIGR02225 (recomb\_XerD: tyrosine recombinase XerD), TIGR02224 (recomb\_XerC: tyrosine  
443 recombinase XerC), and PF13102 (Phage\_int\_SAM\_5: prophage integrase SAM-like domain). Group II  
444 intron proteins were identified as genes annotated with the identifier: TIGR04416 (group\_II\_RT\_mat:  
445 group II intron reverse transcriptase maturase). To identify genes involved in mobilization and  
446 conjugation of MGEs, we used ConjScan via a Galaxy web server (<https://galaxy.pasteur.fr/>)<sup>77</sup>. We  
447 identified transposases using blastp against the IS database with an e-value  $1-e^{-317}$ . The best hit for each  
448 protein was used to annotate the family of transposases.

## 449 Classification of MGEs

450 Putative MGEs were annotated as an ICE if they contained complete conjugation and relaxase modules  
451 and an integrase or DDE-transposase at the boundary of the element. Putative MGEs were annotated as  
452 prophages if there is an integrase or DDE-transposase at the boundary of the element and more than five  
453 genes were annotated with prophage-related Pfams. Putative MGEs were annotated as IMEs if they  
454 contained an integrase or DDE-transposase and relaxase did not contain genes involved in conjugation.  
455 Putative MGEs were annotated as transposons if they contained transposase and were not previously  
456 annotated as an IME. We limited the size of IMEs to 30kb and transposons to 10kb to decrease the  
457 number of false positives. Putative MGEs were annotated as group II introns if the element was less than  
458 10kb, contained a protein with the TIGR04416 signature, and did not contain a gene annotated as  
459 transposase. The remaining putative MGEs were then divided into two groups based on their sizes:  
460 unclassified genomic islands (>10kb), and islets (<10kb). To eliminate spurious MGEs, we only report  
461 genomic islands that contain an integrase or DDE transposase, or those that are related to prophage/ICEs,  
462 and islets that exist in more than two species. After classification and verification, we identified 5600  
463 MGEs in 542 genomes(Supplementary Data 1;Supplementary Data 2).

## 464 Clustering each class of MGEs

465 Pairwise alignment of elements from the same class of MGEs was performed with nucmer (version 3.1)<sup>78</sup>.  
466 Elements with more than 50 percent of the sequence aligned to each other are grouped in the same cluster.  
467 For ICEs, we additionally require that elements in the same cluster should have the same types of  
468 integrase, relaxase and conjugation modules. For IMEs, we required that each cluster has the same the  
469 types of integrases and relaxases for all elements. For transposons, the same cluster should have the same  
470 type and number of IS genes. If a transposon is a “nested” or composite transposon, the family names of  
471 all IS contained within were used to annotate the transposon.

## 472 Construction of phylogenetic trees

473 To build phylogenetic trees of ICE and prophage integrases, we selected a representative integrase  
474 sequence for each cluster. For group II introns, we selected a representative group II intron reverse  
475 transcriptase/maturase from each cluster. The representative protein is a single protein chosen that has the  
476 greatest amino acid identity, on average, to its homolog sequences of the same cluster. We performed  
477 alignment of each group of sequences with mafft(v7.123b)<sup>79</sup> (parameter “--maxiterate 1000”). We used  
478 trimal (version 1.4.rev15)<sup>80</sup> to remove region with gaps representing more than 20% of the total  
479 alignments (parameter “-gt 0.8”). RAxML(version 8.2.10)<sup>81</sup> was used to build the phylogenetic trees from  
480 the alignments using the LG substitution matrix and a gamma model of rate heterogeneity (parameter “-m  
481 PROTGAMMALGF”). Phylogenetic trees were plotted with the R package phytools<sup>82</sup>.

## 482 Functional enrichment analysis of cargo genes

483 Cargo genes are identified by excluding genes involved in transposition and transfer from all genes on  
484 MGEs.  
485 To understand the function of cargo genes, we performed enrichment analysis based on gene ontology  
486 (GO), antibiotic resistance (Resfam), and protein families (Pfam). The enrichments were performed with  
487 all genes present in the genomes as background reference. We used hmmer<sup>83</sup> to search Resfam<sup>28</sup> database  
488 to annotate antibiotic resistant gene. The “--cut\_ga” parameters were used to set the threshold. The best  
489 hits to each gene from the Resfam database were used to annotate antibiotic resistant genes. GO terms and  
490 Pfam signature of the same genes sets were extracted from interproscan result. R package GStat<sup>84</sup> was  
491 used for GO enrichment analysis for GO and Pfam. The R package clusterProfiler<sup>85</sup> was used for the  
492 enrichment analysis of cargo genes based on Resfam and Pfam signatures. P-value of 0.05 were used as  
493 cutoff for all enrichment analysis.

## 494 Correspondence

495 Correspondence and requests for materials should be addressed to:

496 Eric Alm  
497 Massachusetts Institute of Technology  
498 Building NE47-379  
499 Cambridge, MA 02139  
500 [ejalm@mit.edu](mailto:ejalm@mit.edu)  
501 +1 617 253 2726

## 502 Acknowledgements

503 This work is supported by the Center for Microbiome Informatics and Therapeutics at MIT. A.B.H. is a  
504 Merck Fellow of the Helen Hay Whitney Foundation.  
505

## 506 Competing financial interests.

507 Eric Alm is a co-founder and shareholder of Finch Therapeutics, a company that specializes in  
508 microbiome-targeted therapeutics. Other authors declare that they have no competing interests.

## 509 Authors' contributions

510 Data generation, analysis, and presentation: XJ and ABH; Writing of the manuscript: XJ, ABH; Initiated  
511 the study, provided resources, tools and critical review of manuscript: RJX, EA. All authors read and  
512 approved the final manuscript.

## 513 References

- 514 1. Soucy, S. M., Huang, J. & Gogarten, J. P. Horizontal gene transfer: building the web of life. *Nat.*  
515 *Rev. Genet.* **16**, 472–482 (2015).
- 516 2. Smillie, C. S. *et al.* Ecology drives a global network of gene exchange connecting the human  
517 microbiome. *Nature* **480**, 241–244 (2011).
- 518 3. Brito, I. L. *et al.* Mobile genes in the human microbiome are structured from global to individual  
519 scales. *Nature* **535**, 435–439 (2016).
- 520 4. Huddleston, J. R. Horizontal gene transfer in the human gastrointestinal tract: potential spread of  
521 antibiotic resistance genes. *Infect. Drug Resist.* **7**, 167–176 (2014).
- 522 5. Roberts, A. P. & Mullany, P. Oral biofilms: a reservoir of transferable, bacterial, antimicrobial  
523 resistance. *Expert Rev. Anti. Infect. Ther.* **8**, 1441–1450 (2010).
- 524 6. Hehemann, J.-H. *et al.* Transfer of carbohydrate-active enzymes from marine bacteria to Japanese  
525 gut microbiota. *Nature* **464**, 908–912 (2010).
- 526 7. Krupovic, M., Prangishvili, D., Hendrix, R. W. & Bamford, D. H. Genomics of bacterial and  
527 archaeal viruses: dynamics within the prokaryotic virosphere. *Microbiol. Mol. Biol. Rev.* **75**, 610–  
528 635 (2011).
- 529 8. Lambowitz, A. M. & Zimmerly, S. Group II introns: mobile ribozymes that invade DNA. *Cold*  
530 *Spring Harb. Perspect. Biol.* **3**, a003616 (2011).
- 531 9. Treangen, T. J. & Rocha, E. P. C. Horizontal transfer, not duplication, drives the expansion of  
532 protein families in prokaryotes. *PLoS Genet.* **7**, e1001284 (2011).
- 533 10. Hacker, J. & Carniel, E. Ecological fitness, genomic islands and bacterial pathogenicity. A  
534 Darwinian view of the evolution of microbes. *EMBO Rep.* **2**, 376–381 (2001).
- 535 11. Wozniak, R. A. F. & Waldor, M. K. Integrative and conjugative elements: mosaic mobile genetic

- 536 elements enabling dynamic lateral gene flow. *Nat. Rev. Microbiol.* **8**, 552–563 (2010).
- 537 12. Johnson, C. M. & Grossman, A. D. Integrative and Conjugative Elements (ICEs): What They Do  
538 and How They Work. *Annu. Rev. Genet.* **49**, 577–601 (2015).
- 539 13. Bellanger, X., Payot, S., Leblond-Bourget, N. & Guédon, G. Conjugative and mobilizable genomic  
540 islands in bacteria: evolution and diversity. *FEMS Microbiol. Rev.* **38**, 720–760 (2014).
- 541 14. Ravenhall, M., Škunca, N., Lassalle, F. & Dessimoz, C. Inferring horizontal gene transfer. *PLoS*  
542 *Comput. Biol.* **11**, e1004095 (2015).
- 543 15. Hoen, D. R. *et al.* A call for benchmarking transposable element annotation methods. *Mob. DNA* **6**,  
544 13 (2015).
- 545 16. Arndt, D. *et al.* PHASTER: a better, faster version of the PHAST phage search tool. *Nucleic Acids*  
546 *Res.* **44**, W16–21 (2016).
- 547 17. Siguier, P., Perochon, J., Lestrade, L., Mahillon, J. & Chandler, M. ISfinder: the reference centre for  
548 bacterial insertion sequences. *Nucleic Acids Res.* **34**, D32–6 (2006).
- 549 18. Bi, D. *et al.* ICEberg: a web-based resource for integrative and conjugative elements found in  
550 Bacteria. *Nucleic Acids Res.* **40**, D621–6 (2012).
- 551 19. Leplae, R., Lima-Mendez, G. & Toussaint, A. ACLAME: a CLAssification of Mobile genetic  
552 Elements, update 2010. *Nucleic Acids Res.* **38**, D57–61 (2010).
- 553 20. Trappe, K., Marschall, T. & Renard, B. Y. Detecting horizontal gene transfer by mapping  
554 sequencing reads across species boundaries. *Bioinformatics* **32**, i595–i604 (2016).
- 555 21. Human Microbiome Project Consortium. Structure, function and diversity of the healthy human  
556 microbiome. *Nature* **486**, 207–214 (2012).
- 557 22. Siguier, P., Gourbeyre, E. & Chandler, M. Bacterial insertion sequences: their genomic impact and  
558 diversity. *FEMS Microbiol. Rev.* **38**, 865–891 (2014).
- 559 23. Guglielmini, J. *et al.* Key components of the eight classes of type IV secretion systems involved in  
560 bacterial conjugation or protein secretion. *Nucleic Acids Res.* **42**, 5715–5727 (2014).
- 561 24. Guglielmini, J., de la Cruz, F. & Rocha, E. P. C. Evolution of conjugation and type IV secretion  
562 systems. *Mol. Biol. Evol.* **30**, 315–331 (2013).
- 563 25. Rankin, D. J., Rocha, E. P. C. & Brown, S. P. What traits are carried on mobile genetic elements,  
564 and why? *Heredity* **106**, 1–10 (2011).
- 565 26. Ashburner, M. *et al.* Gene Ontology: tool for the unification of biology. *Nat. Genet.* **25**, 25–29  
566 (2000).
- 567 27. Finn, R. D. *et al.* Pfam: the protein families database. *Nucleic Acids Res.* **42**, D222–30 (2014).
- 568 28. Gibson, M. K., Forsberg, K. J. & Dantas, G. Improved annotation of antibiotic resistance  
569 determinants reveals microbial resistomes cluster by ecology. *ISME J.* **9**, 207–216 (2015).
- 570 29. Connelly, S. *et al.* SYN-004 (ribaxamase), an Oral Beta-Lactamase, Mitigates Antibiotic-Mediated  
571 Dysbiosis in a Porcine Gut Microbiome Model. *J. Appl. Microbiol.* (2017). doi:10.1111/jam.13432
- 572 30. Volkova, V. V., Lu, Z., Besser, T. & Gröhn, Y. T. Modeling the infection dynamics of  
573 bacteriophages in enteric Escherichia coli: estimating the contribution of transduction to  
574 antimicrobial gene spread. *Appl. Environ. Microbiol.* **80**, 4350–4362 (2014).
- 575 31. Enault, F. *et al.* Phages rarely encode antibiotic resistance genes: a cautionary tale for virome  
576 analyses. *ISME J.* **11**, 237–247 (2017).
- 577 32. Shoemaker, N. B., Vlamakis, H., Hayes, K. & Salyers, A. A. Evidence for extensive resistance gene  
578 transfer among Bacteroides spp. and among Bacteroides and other genera in the human colon. *Appl.*  
579 *Environ. Microbiol.* **67**, 561–568 (2001).
- 580 33. Devlin, A. S. & Fischbach, M. A. A biosynthetic pathway for a prominent class of microbiota-  
581 derived bile acids. *Nat. Chem. Biol.* **11**, 685–690 (2015).
- 582 34. Begley, M., Gahan, C. G. M. & Hill, C. The interaction between bacteria and bile. *FEMS Microbiol.*  
583 *Rev.* **29**, 625–651 (2005).
- 584 35. Jones, B. V., Begley, M., Hill, C., Gahan, C. G. M. & Marchesi, J. R. Functional and comparative  
585 metagenomic analysis of bile salt hydrolase activity in the human gut microbiome. *Proc. Natl. Acad.*  
586 *Sci. U. S. A.* **105**, 13580–13585 (2008).



- 587 36. Johansson, M. E. V. *et al.* The inner of the two Muc2 mucin-dependent mucus layers in colon is  
588 devoid of bacteria. *Proceedings of the National Academy of Sciences* **105**, 15064–15069 (2008).
- 589 37. Johansson, M. E. V., Larsson, J. M. H. & Hansson, G. C. The two mucus layers of colon are  
590 organized by the MUC2 mucin, whereas the outer layer is a legislator of host-microbial interactions.  
591 *Proc. Natl. Acad. Sci. U. S. A.* **108 Suppl 1**, 4659–4665 (2011).
- 592 38. Tailford, L. E., Crost, E. H., Kavanaugh, D. & Juge, N. Mucin glycan foraging in the human gut  
593 microbiome. *Front. Genet.* **6**, 81 (2015).
- 594 39. Li, H. *et al.* The outer mucus layer hosts a distinct intestinal microbial niche. *Nat. Commun.* **6**, 8292  
595 (2015).
- 596 40. Lombard, V., Golaconda Ramulu, H., Drula, E., Coutinho, P. M. & Henrissat, B. The carbohydrate-  
597 active enzymes database (CAZy) in 2013. *Nucleic Acids Res.* **42**, D490–5 (2014).
- 598 41. Koropatkin, N. M., Cameron, E. A. & Martens, E. C. How glycan metabolism shapes the human gut  
599 microbiota. *Nat. Rev. Microbiol.* **10**, 323–335 (2012).
- 600 42. Ravcheev, D. A., Godzik, A., Osterman, A. L. & Rodionov, D. A. Polysaccharides utilization in  
601 human gut bacterium *Bacteroides thetaiotaomicron*: comparative genomics reconstruction of  
602 metabolic and regulatory networks. *BMC Genomics* **14**, 873 (2013).
- 603 43. Comstock, L. E. *et al.* Analysis of a capsular polysaccharide biosynthesis locus of *Bacteroides*  
604 *fragilis*. *Infect. Immun.* **67**, 3525–3532 (1999).
- 605 44. Zitomersky, N. L., Coyne, M. J. & Comstock, L. E. Longitudinal analysis of the prevalence,  
606 maintenance, and IgA response to species of the order Bacteroidales in the human gut. *Infect.*  
607 *Immun.* **79**, 2012–2020 (2011).
- 608 45. Wu, M. *et al.* Genetic determinants of in vivo fitness and diet responsiveness in multiple human gut  
609 *Bacteroides*. *Science* **350**, aac5992 (2015).
- 610 46. Patrick, S. *et al.* Twenty-eight divergent polysaccharide loci specifying within- and amongst-strain  
611 capsule diversity in three strains of *Bacteroides fragilis*. *Microbiology* **156**, 3255–3269 (2010).
- 612 47. Coyne, M. J., Chatzidaki-Livanis, M., Paoletti, L. C. & Comstock, L. E. Role of glycan synthesis in  
613 colonization of the mammalian gut by the bacterial symbiont *Bacteroides fragilis*. *Proceedings of the*  
614 *National Academy of Sciences* **105**, 13099–13104 (2008).
- 615 48. Xu, J. *et al.* Evolution of symbiotic bacteria in the distal human intestine. *PLoS Biol.* **5**, e156 (2007).
- 616 49. Albenberg, L. *et al.* Correlation between intraluminal oxygen gradient and radial partitioning of  
617 intestinal microbiota. *Gastroenterology* **147**, 1055–63.e8 (2014).
- 618 50. Duncan, S. H., Hold, G. L., Harmsen, H. J. M., Stewart, C. S. & Flint, H. J. Growth requirements  
619 and fermentation products of *Fusobacterium prausnitzii*, and a proposal to reclassify it as  
620 *Faecalibacterium prausnitzii* gen. nov., comb. nov. *Int. J. Syst. Evol. Microbiol.* **52**, 2141–2146  
621 (2002).
- 622 51. Browne, H. P. *et al.* Culturing of ‘unculturable’ human microbiota reveals novel taxa and extensive  
623 sporulation. *Nature* **533**, 543–546 (2016).
- 624 52. Berendsen, E. M., Boekhorst, J., Kuipers, O. P. & Wells-Bennik, M. H. J. A mobile genetic element  
625 profoundly increases heat resistance of bacterial spores. *ISME J.* **10**, 2633–2642 (2016).
- 626 53. Sommer, M. O. A., Church, G. M. & Dantas, G. The human microbiome harbors a diverse reservoir  
627 of antibiotic resistance genes. *Virulence* **1**, 299–303 (2010).
- 628 54. Whittle, G., Hund, B. D., Shoemaker, N. B. & Salyers, A. A. Characterization of the 13-kilobase  
629 *ermF* region of the *Bacteroides* conjugative transposon CTnDOT. *Appl. Environ. Microbiol.* **67**,  
630 3488–3495 (2001).
- 631 55. Garnier, F., Taourit, S., Glaser, P., Courvalin, P. & Galimand, M. Characterization of transposon  
632 Tn1549, conferring VanB-type resistance in *Enterococcus* spp. *Microbiology* **146 ( Pt 6)**, 1481–1489  
633 (2000).
- 634 56. Napolitano, M. G., Almagro-Moreno, S. & Boyd, E. F. Dichotomy in the evolution of pathogenicity  
635 island and bacteriophage encoded integrases from pathogenic *Escherichia coli* strains. *Infect. Genet.*  
636 *Evol.* **11**, 423–436 (2011).
- 637 57. Van Houdt, R., Leplae, R., Lima-Mendez, G., Mergeay, M. & Toussaint, A. Towards a more



- 638 accurate annotation of tyrosine-based site-specific recombinases in bacterial genomes. *Mob. DNA* **3**,  
639 6 (2012).
- 640 58. Whittle, G., Hamburger, N., Shoemaker, N. B. & Salyers, A. A. A bacteroides conjugative  
641 transposon, CTnERL, can transfer a portion of itself by conjugation without excising from the  
642 chromosome. *J. Bacteriol.* **188**, 1169–1174 (2006).
- 643 59. Truong, D. T. *et al.* MetaPhlan2 for enhanced metagenomic taxonomic profiling. *Nat. Methods* **12**,  
644 902–903 (2015).
- 645 60. Wood, D. E. & Salzberg, S. L. Kraken: ultrafast metagenomic sequence classification using exact  
646 alignments. *Genome Biol.* **15**, R46 (2014).
- 647 61. Ounit, R., Wanamaker, S., Close, T. J. & Lonardi, S. CLARK: fast and accurate classification of  
648 metagenomic and genomic sequences using discriminative k-mers. *BMC Genomics* **16**, 236 (2015).
- 649 62. Ahn, T.-H., Chai, J. & Pan, C. Sigma: strain-level inference of genomes from metagenomic analysis  
650 for biosurveillance. *Bioinformatics* **31**, 170–177 (2015).
- 651 63. Luo, C. *et al.* ConStrains identifies microbial strains in metagenomic datasets. *Nat. Biotechnol.* **33**,  
652 1045–1052 (2015).
- 653 64. Greenblum, S., Carr, R. & Borenstein, E. Extensive strain-level copy-number variation across human  
654 gut microbiome species. *Cell* **160**, 583–594 (2015).
- 655 65. Nayfach, S., Rodriguez-Mueller, B., Garud, N. & Pollard, K. S. An integrated metagenomics  
656 pipeline for strain profiling reveals novel patterns of bacterial transmission and biogeography.  
657 *Genome Res.* **26**, 1612–1625 (2016).
- 658 66. Smit, A., Hubley, R. & Green, P. RepeatMasker Open-4.0. 2013--2015. *Institute for Systems*  
659 *Biology*. <http://repeatmasker.org> (2015).
- 660 67. Bao, W., Kojima, K. K. & Kohany, O. Repbase Update, a database of repetitive elements in  
661 eukaryotic genomes. *Mob. DNA* **6**, 11 (2015).
- 662 68. Antibiotic / Antimicrobial Resistance | CDC. Available at:  
663 <https://www.cdc.gov/drugresistance/index.html>. (Accessed: 14th June 2017)
- 664 69. Caballero, S. *et al.* Cooperating Commensals Restore Colonization Resistance to Vancomycin-  
665 Resistant *Enterococcus faecium*. *Cell Host Microbe* **21**, 592–602.e4 (2017).
- 666 70. Mimeo, M., Tucker, A. C., Voigt, C. A. & Lu, T. K. Programming a Human Commensal Bacterium,  
667 *Bacteroides thetaiotaomicron*, to Sense and Respond to Stimuli in the Murine Gut Microbiota. *Cell*  
668 *Syst* **1**, 62–71 (2015).
- 669 71. Liu, Y.-J., Zhang, J., Cui, G.-Z. & Cui, Q. Current progress of targetron technology: development,  
670 improvement and application in metabolic engineering. *Biotechnol. J.* **10**, 855–865 (2015).
- 671 72. Ondov, B. D. *et al.* Mash: fast genome and metagenome distance estimation using MinHash.  
672 *Genome Biol.* **17**, 132 (2016).
- 673 73. Li, H. & Durbin, R. Fast and accurate short read alignment with Burrows–Wheeler transform.  
674 *Bioinformatics* **25**, 1754–1760 (2009).
- 675 74. Hyatt, D. *et al.* Prodigal: prokaryotic gene recognition and translation initiation site identification.  
676 *BMC Bioinformatics* **11**, 119 (2010).
- 677 75. Jones, P. *et al.* InterProScan 5: genome-scale protein function classification. *Bioinformatics* **30**,  
678 1236–1240 (2014).
- 679 76. Fouts, D. E. Phage\_Finder: automated identification and classification of prophage regions in  
680 complete bacterial genome sequences. *Nucleic Acids Res.* **34**, 5839–5851 (2006).
- 681 77. Abby, S. S. *et al.* Identification of protein secretion systems in bacterial genomes. *Sci. Rep.* **6**, 23080  
682 (2016).
- 683 78. Kurtz, S. *et al.* Versatile and open software for comparing large genomes. *Genome Biol.* **5**, R12  
684 (2004).
- 685 79. Katoh, K. & Standley, D. M. MAFFT multiple sequence alignment software version 7:  
686 improvements in performance and usability. *Mol. Biol. Evol.* **30**, 772–780 (2013).
- 687 80. Capella-Gutiérrez, S., Silla-Martínez, J. M. & Gabaldón, T. trimAl: a tool for automated alignment  
688 trimming in large-scale phylogenetic analyses. *Bioinformatics* **25**, 1972–1973 (2009).

- 689 81. Stamatakis, A. RAxML version 8: a tool for phylogenetic analysis and post-analysis of large  
690 phylogenies. *Bioinformatics* **30**, 1312–1313 (2014).
- 691 82. Revell, L. J. Phytools: Phylogenetic tools or comparative biology (and other things). (2011).
- 692 83. Johnson, L. S., Eddy, S. R. & Portugaly, E. Hidden Markov model speed heuristic and iterative  
693 HMM search procedure. *BMC Bioinformatics* **11**, 431 (2010).
- 694 84. Beissbarth, T. & Speed, T. P. GOstat: find statistically overrepresented Gene Ontologies within a  
695 group of genes. *Bioinformatics* **20**, 1464–1465 (2004).
- 696 85. Yu, G., Wang, L.-G., Han, Y. & He, Q.-Y. clusterProfiler: an R package for comparing biological  
697 themes among gene clusters. *OMICS* **16**, 284–287 (2012).

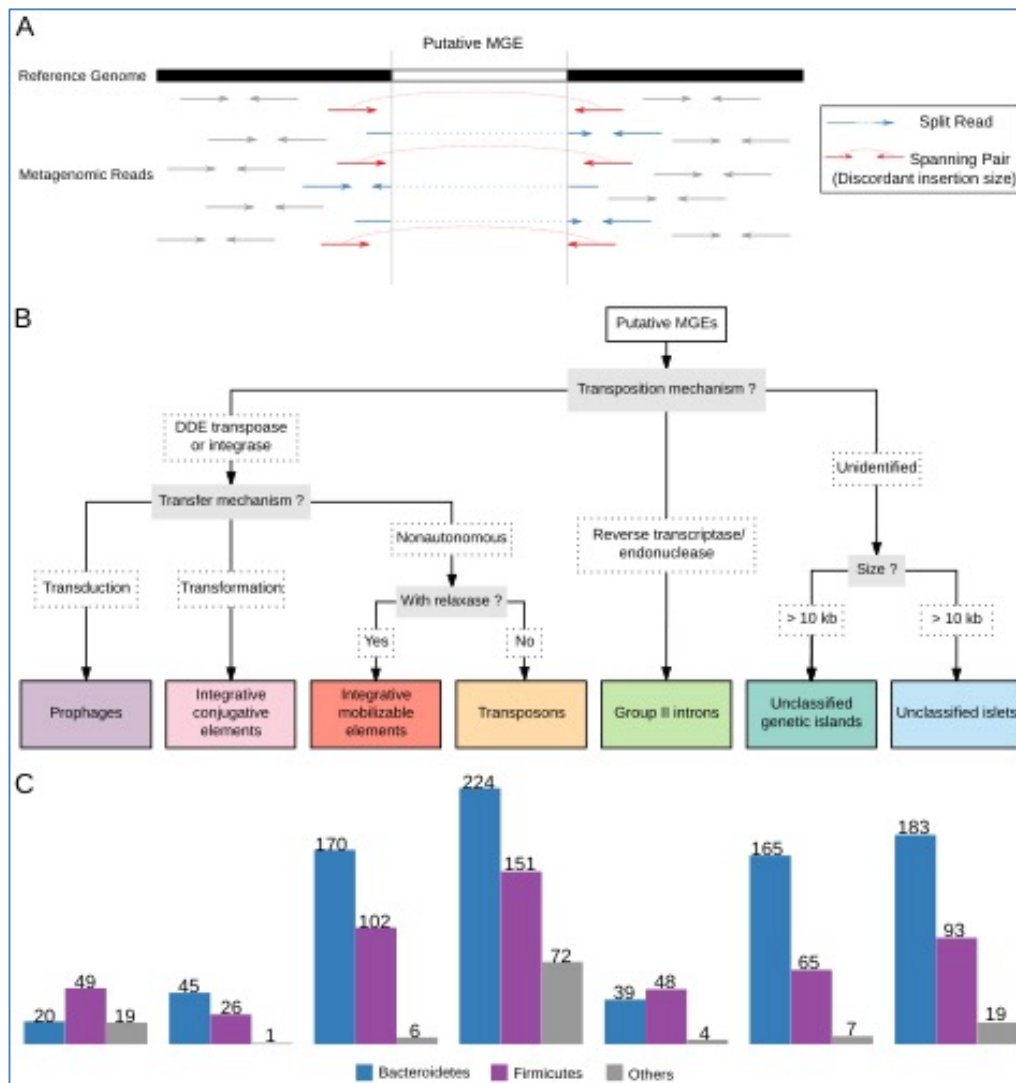

698 **Figure 1 | Identification and classification of gut microbiome MGEs.** (A) The method used to identify  
699 putative MGEs using split reads and discordantly-mapped paired-end reads. Split reads are colored blue,  
700 and discordantly-mapped paired-end reads are colored red. (B) The method used to classify MGEs based  
701 on gene signatures. (C) The number of MGE clusters identified stratified by phyla and MGE  
702 classification.

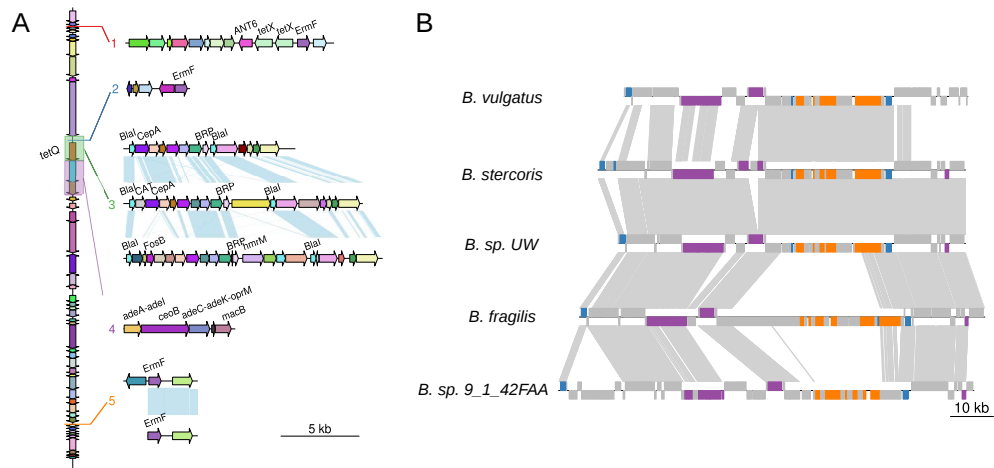

703 **Figure 2 | Examples of niche-adaptive genes.** (A) CTn-DOT-like elements have acquired antibiotic  
704 resistance genes on multiple, independent occasions. Here, we show insertion sites of antibiotic resistant  
705 genes in CTnDOT-like elements. A CTnDOT-like ICE is shown on the left. Orthologs between elements  
706 are visualized using genoPlotR (light blue connections) and are the same color. Numbers in the top panel  
707 represent the insertion site of the numbered elements below. Antibiotic resistance genes are labeled. (B)  
708 ICEs are involved in the transfer of capsular polysaccharide biosynthesis loci between Bacteroidetes  
709 species. Here, we show examples of ICEs containing capsular polysaccharide biosynthesis loci. Orthologs  
710 between elements are plotted with GenoPlotR. Genes involved in capsular polysaccharide biosynthesis  
711 are colored orange, integrases are colored blue, and genes involved in conjugation are colored purple.  
712 Grey links indicate orthologs between elements.

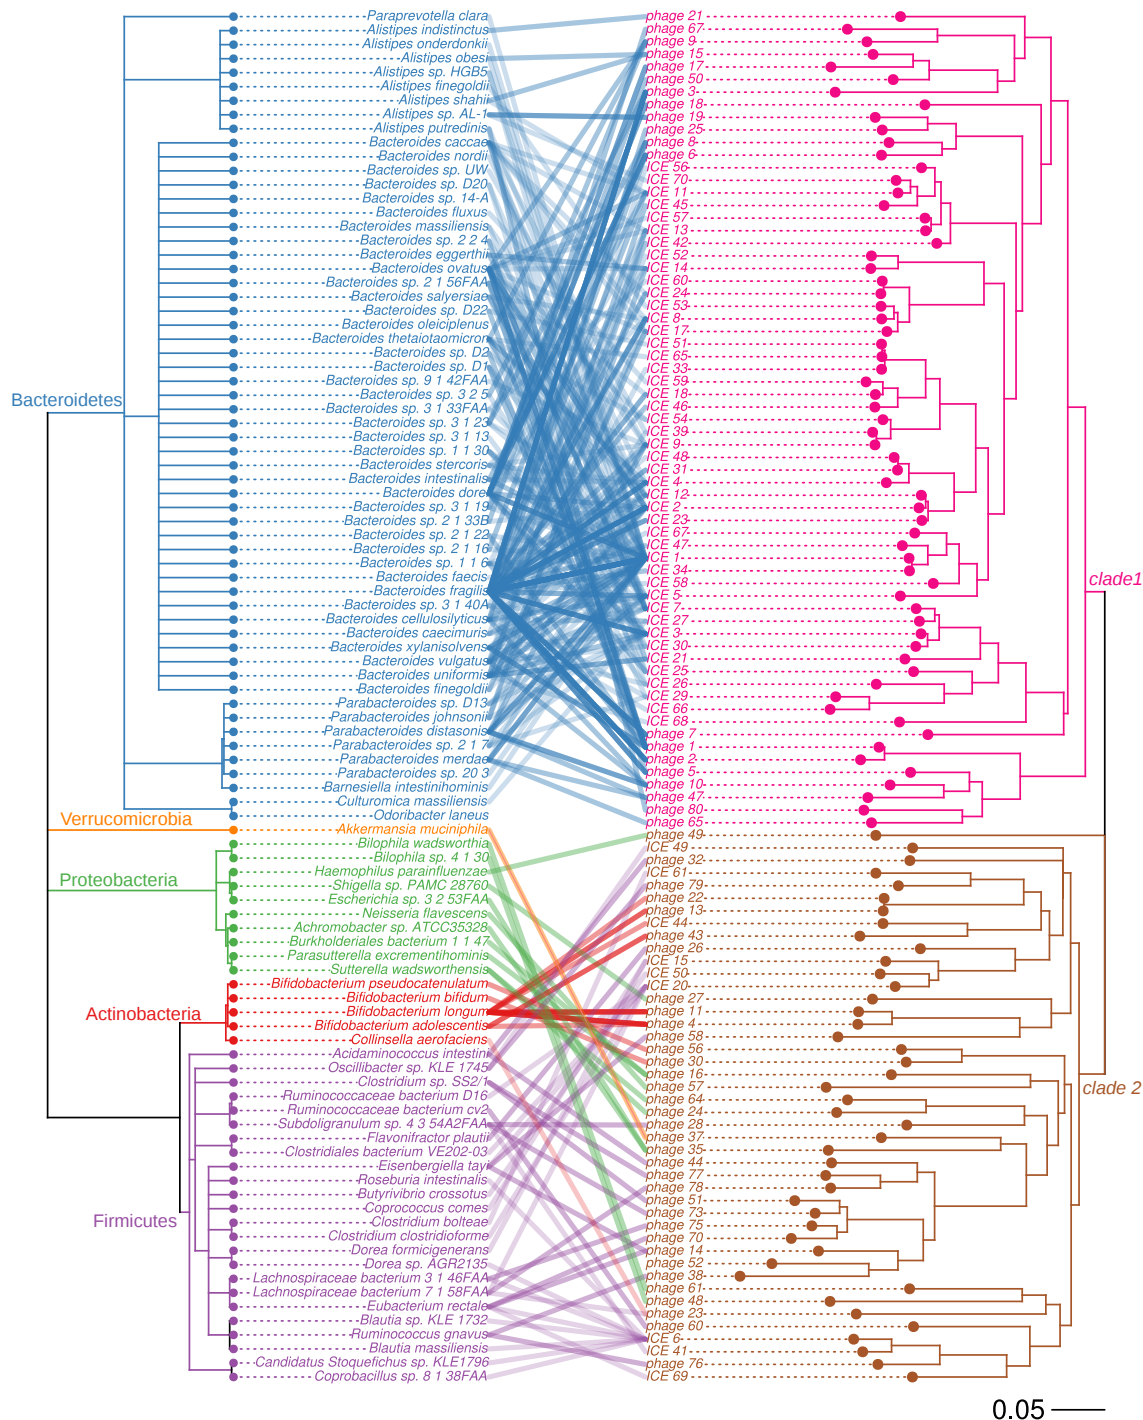

713 **Figure 3 | Tanglegram of host species lineages and phylogeny of the integrases in prophages and**  
 714 **ICEs.** A tanglegram of tyrosine integrases from ICEs and prophages with the species phylogeny plotted  
 715 on the left and tyrosine integrase phylogeny plotted on the right. Connections are drawn between a  
 716 species and the tyrosine integrase(s) found in that species and each connecting line is colored according to  
 717 host bacteria phylum.

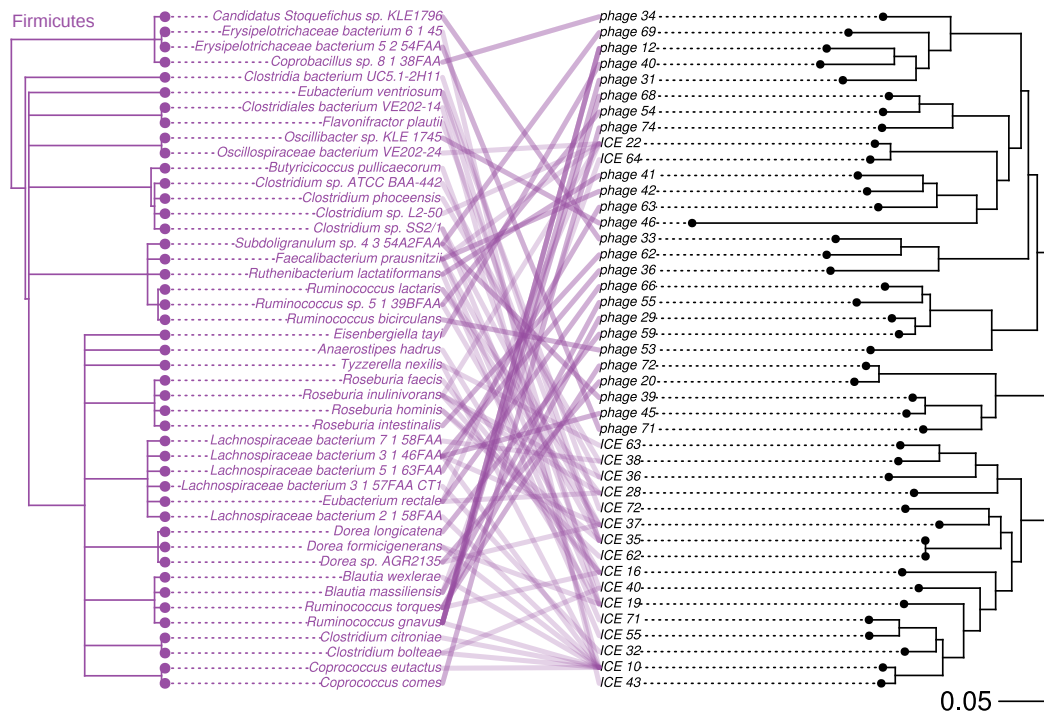

718 **Figure 4 | Tanglegram of host species lineages and phylogeny of serine integrases in prophages and**  
719 **ICEs.** A tanglegram of serine integrases from ICEs and prophages with the species phylogeny plotted on  
720 the left and tyrosine integrase phylogeny plotted on the right. Connections are drawn between a species  
721 and the serine integrase(s) found in that species.

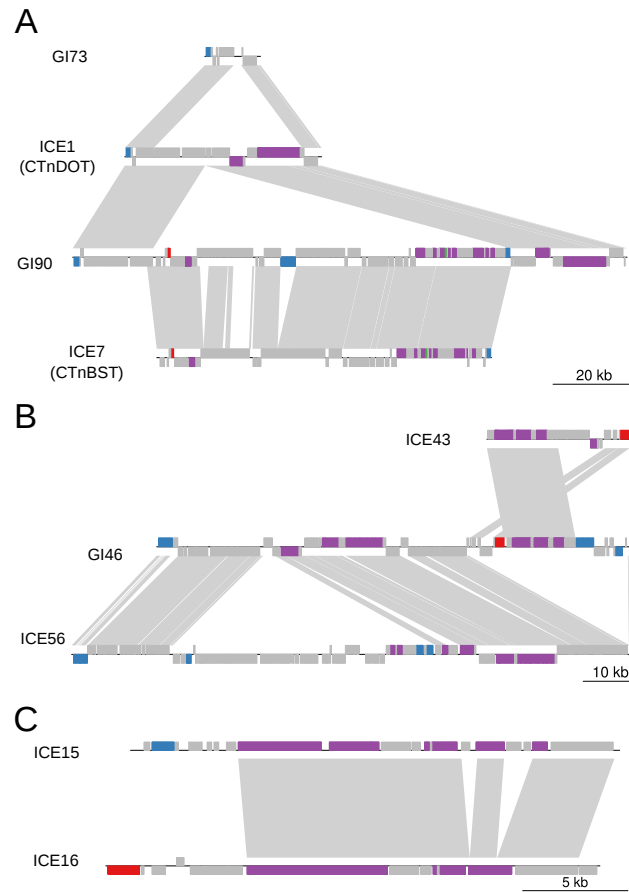

722 **Figure 5 | Modular evolution of MGEs.** Examples of deletion, acquisition, and exchange of gene  
723 modules between MGEs. Orthologous genes between elements are shown with grey connections and are  
724 plotted with genoPlotR. Tyrosine integrases are colored blue, serine integrases are colored red, and genes  
725 involved in conjugation are colored purple. (A) GI73 was likely formed via a deletion of a CTnDOT-like  
726 ICE. GI90 was formed from an insertion of the ICE CTnBST into a CTnDOT-like ICE to form a large,  
727 composite GI that transfers as a unit. (B) An example of the tandem insertion of two ICEs to form a larger  
728 GI that moves as a unit. (C) An example of recombination module exchanges between ICE15 and ICE16.



729 Supplementary information

730 **Supplementary Figure 1:** Classification of gut microbiome MGEs at the phylum level

731 **Supplementary Figure 2:** Tanglegram of host species lineages and phylogeny of group II intron proteins

732 **Supplementary Table 1:** Antibiotic resistant genes identified in MGEs classes

733 Supplementary Tables and Data

734 **Supplementary Table 2:** Annotation and classification of MGEs (xlsx)

735 **Supplementary Table 3:** Niche adaptive cargo genes (xlsx)

736 **Supplementary Table 4:** Enrichment analysis of cargo genes (xlsx)

737 **Supplementary Table 5:** Annotation of regions with ARG insertions in CTnDOT-like elements (xlsx)

738 **Supplementary Data 1:** MGE sequences (fasta)

739 **Supplementary Data 2:** Annotation of genes in MGEs (gff3)

740 **Supplementary Data 3:** Sequences of CTnDOT-like elements with ARG insertions (fasta)

741 **Supplementary Data 4:** Scripts to implement the SRID method and the genome assembly accession

742 numbers and HMP SRA accession numbers used in this study.(zipped txt)



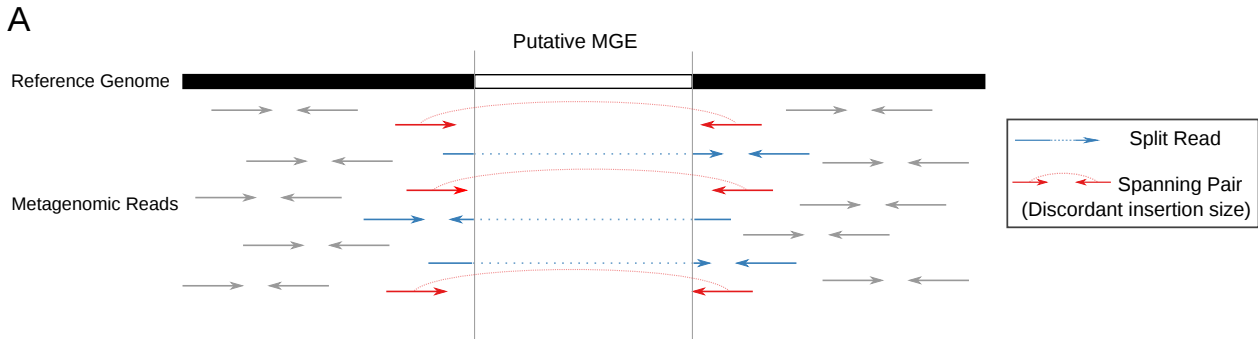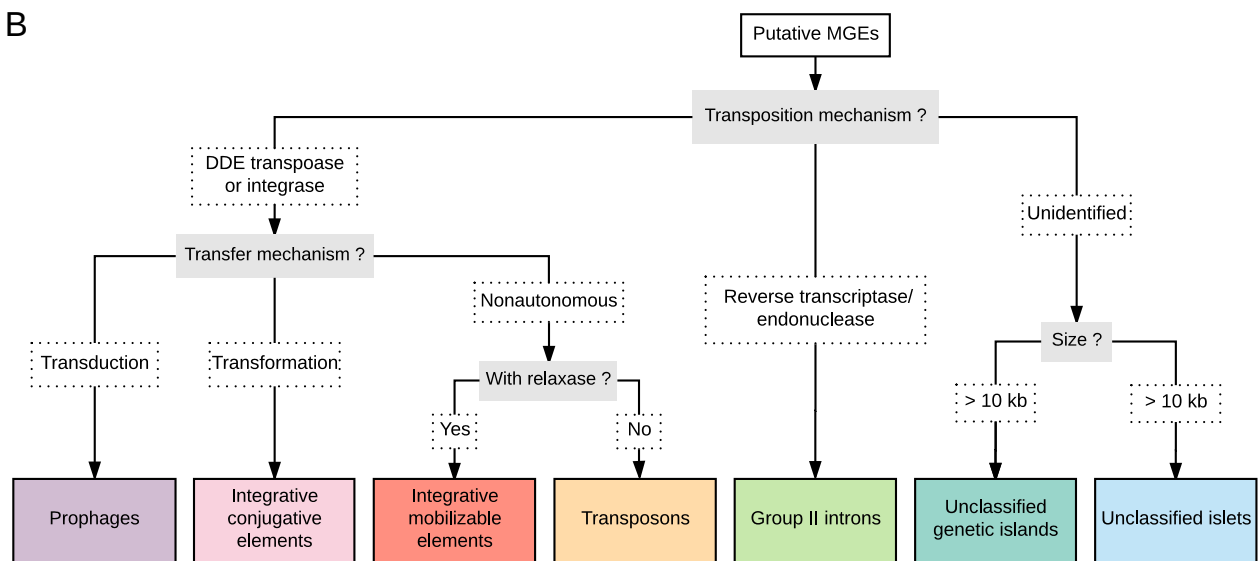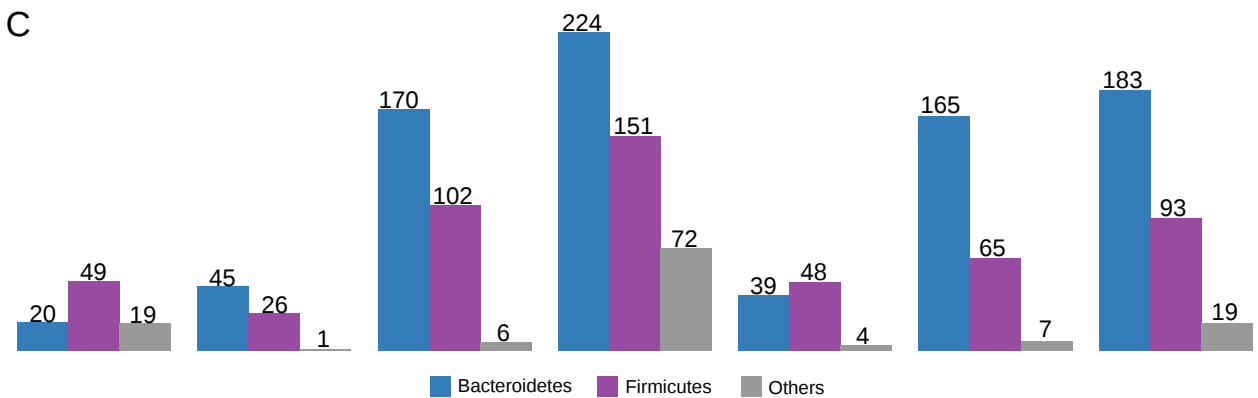

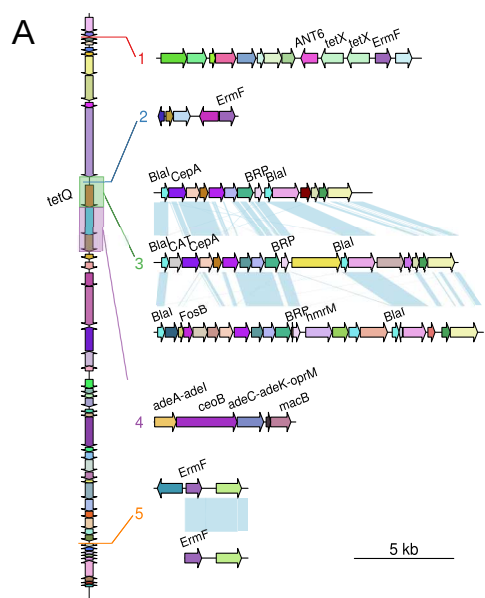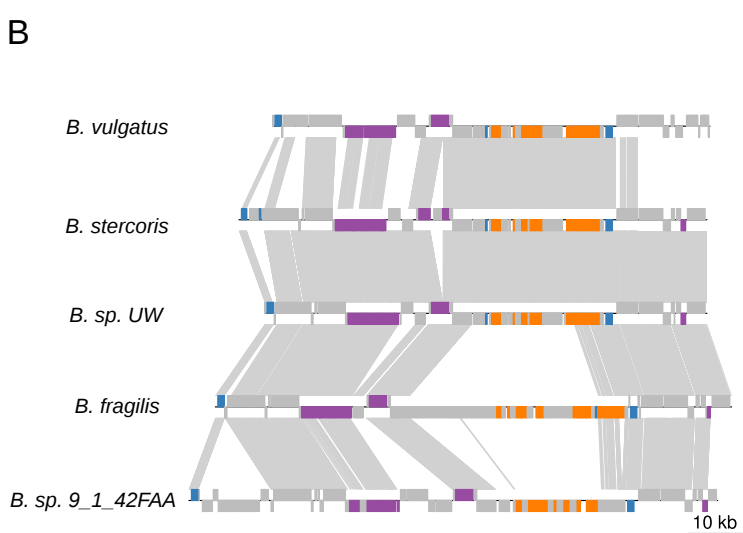

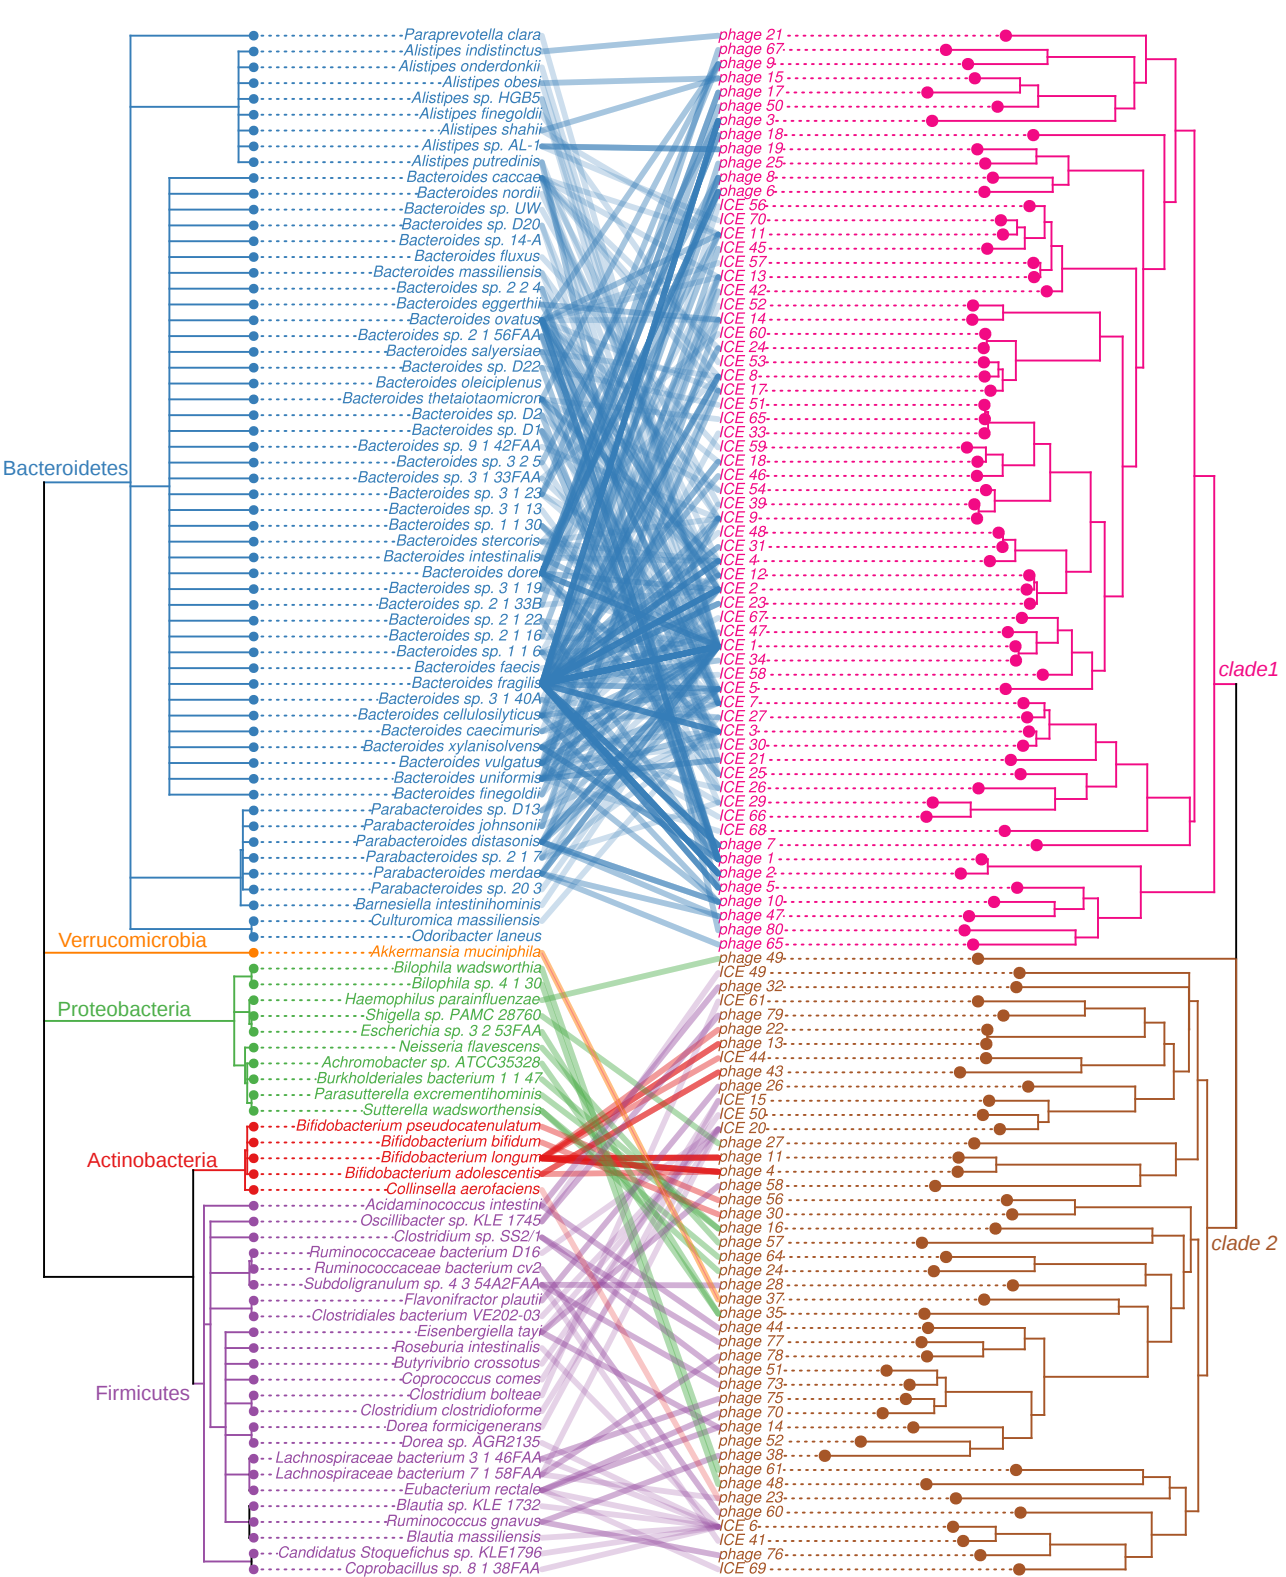

## Firmicutes

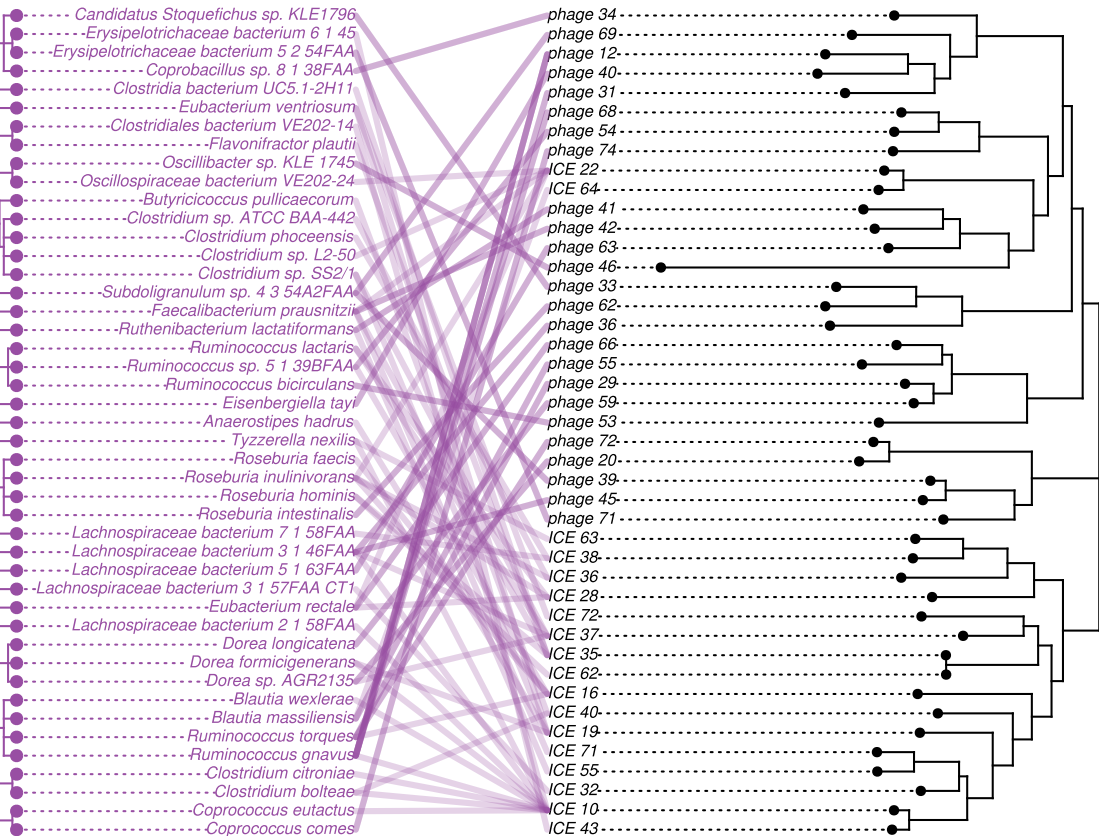

**A**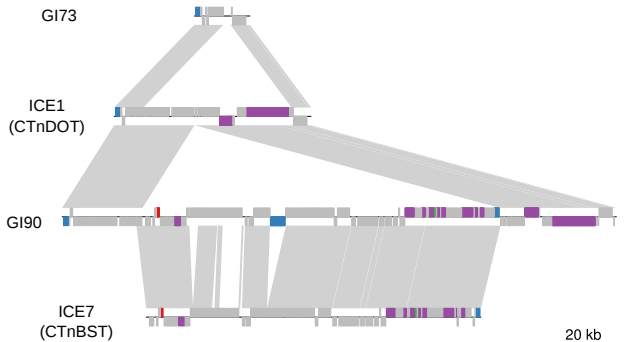**B**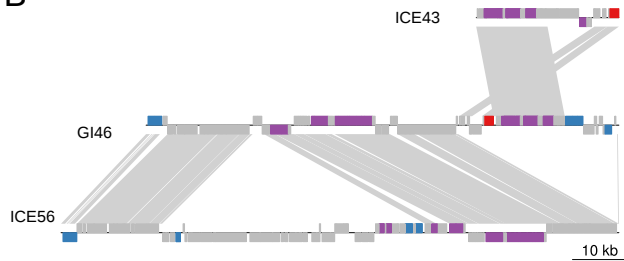**C**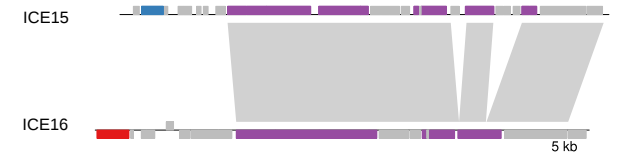

Source: http://biorxiv.org/content/10.1101/214213v2.full.pdf
